# Supplementary material for: When Leaders and Followers Match: Unveiling the Nexus Between Despotic Leadership, Supervisor–Employee Value Congruence, and Organizational Deviance—Evidence From Egypt
Source: PubMed Central journal article supplement — SAGE Open Nurs. 2024 Nov 18;10:23779608241293670. doi: 10.1177/23779608241293670 (PMC11574906; doi:10.1177/23779608241293670), 2024-11-18
Supplement: sj-pdf-1-son-10.1177_23779608241293670.pdf [file sj-pdf-1-son-10.1177_23779608241293670.pdf]

# Despotic Leadership and Organizational Deviance: The Moderating Role of Value Congruence

| 5=<br>Strongly<br>Agree | 4=<br>Agree | 3=<br>neutral | 2 =<br>Disagree | 1=<br>Strongly<br>Disagree | Items                                                                                               |
|-------------------------|-------------|---------------|-----------------|----------------------------|-----------------------------------------------------------------------------------------------------|
|                         |             |               |                 |                            | <b>Despotic leadership</b>                                                                          |
|                         |             |               |                 |                            | 1. My supervisor is punishing; has no pity                                                          |
|                         |             |               |                 |                            | 2. My supervisor is in charge; intolerant to disagreement, gives orders                             |
|                         |             |               |                 |                            | 3. My supervisor acts like a tyrant or despot; imperious                                            |
|                         |             |               |                 |                            | 4. My supervisor tends to be unwilling to relinquish control of projects.                           |
|                         |             |               |                 |                            | 5. My supervisor expects unquestioning obedience from subordinates                                  |
|                         |             |               |                 |                            | 6. My supervisor is unforgiving; seeks revenge when wronged                                         |
|                         |             |               |                 |                            | <b>Organizational Deviance</b>                                                                      |
|                         |             |               |                 |                            | 1. Taken property from work without permission                                                      |
|                         |             |               |                 |                            | 2. Spent too much time fantasizing or daydreaming instead of working                                |
|                         |             |               |                 |                            | 3. Falsified a receipt to get reimbursed for more money than you spent on business expenses         |
|                         |             |               |                 |                            | 4. Taken an additional or longer break than is acceptable at your workplace                         |
|                         |             |               |                 |                            | 5. Come in late to work without permission                                                          |
|                         |             |               |                 |                            | 6. Littered your work environment                                                                   |
|                         |             |               |                 |                            | 7. Neglected to follow your boss's instructions                                                     |
|                         |             |               |                 |                            | 8. Intentionally worked slower than you could have worked                                           |
|                         |             |               |                 |                            | 9. Discussed confidential company information with an unauthorized person                           |
|                         |             |               |                 |                            | 10. Used an illegal drug or consumed alcohol on the job                                             |
|                         |             |               |                 |                            | 11. Put little effort into your work                                                                |
|                         |             |               |                 |                            | 12. Dragged out work in order to get overtime                                                       |
|                         |             |               |                 |                            | <b>Value Congruence:</b>                                                                            |
|                         |             |               |                 |                            | 1. The things that I value in a job are very similar to the things that my immediate manager values |
|                         |             |               |                 |                            | 2. My work values match my immediate manager's work values                                          |
|                         |             |               |                 |                            | 3. My immediate manager's work values provide a good fit with the things that I value in a job      |
